# Supplementary material for: Sociodemographic Characteristics and Comorbidities of Patients With Long COVID and Persistent Olfactory Dysfunction
Source: PubMed Central journal article supplement (PMC9459661; doi:10.1001/jamanetworkopen.2022.30637), 2022-09-08
Supplement: jamanetwopen-e2230637-s001.pdf [file jamanetwopen-e2230637-s001.pdf]

## Supplementary Online Content

Mendes Paranhos AC, Nazareth Dias ÁR, Machado da Silva LC, et al.  
Sociodemographic characteristics and comorbidities of patients with long COVID  
and persistent olfactory dysfunction. *JAMA Netw Open.* 2022;5(9):e2230637.  
doi:10.1001/jamanetworkopen.2022.30637

**eFigure.** Description of Connecticut Chemosensory Clinical Research Center Test  
Procedures and Score Calculation

This supplementary material has been provided by the authors to give readers additional  
information about their work.

**eFigure.** Description of Connecticut Chemosensory Clinical Research Center Test Procedures and Score Calculation

## CCRC TEST PROCEDURES

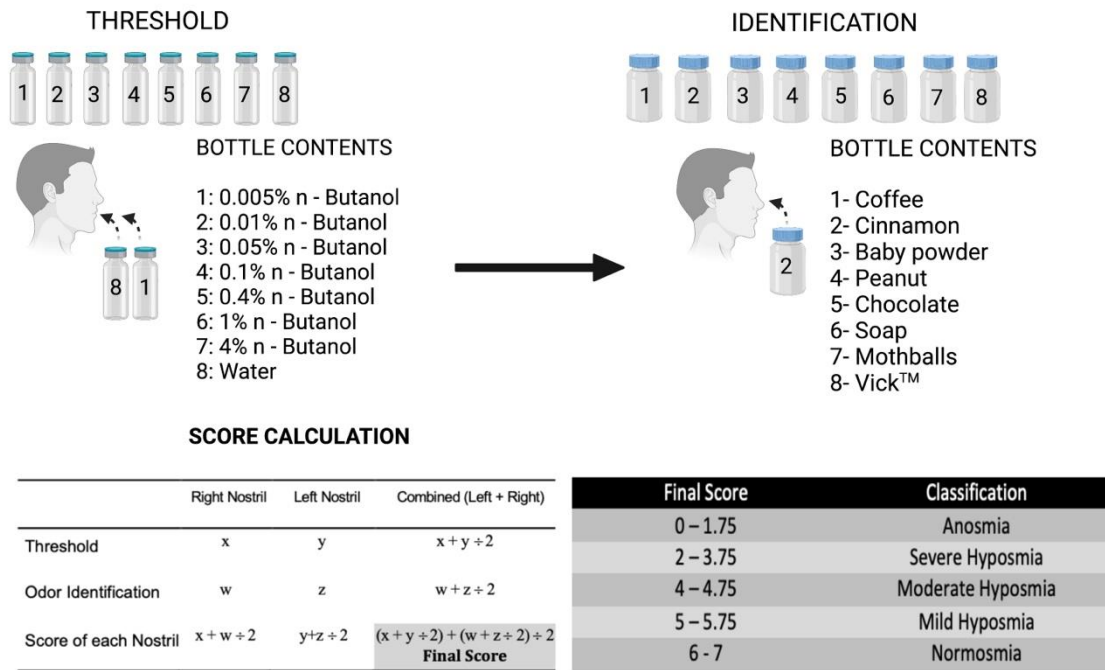

**Legends:** To determine the olfactory threshold, individuals smell different concentrations of n-butanol (as listed). The score is from 0 to 7, where minor concentration corresponds to major score (7), and error (non-detection of n-butanol) corresponds to 0. To determine the identification of odours, individuals smell different substances (as listed). The score corresponds to the number of assertions in a list of different substances. The final score and classification are determined as showed in table.
